# Supplementary material
Source: PubMed Central journal article supplement (PMC2254921)
Supplement: plntcell_tpc.107.056606_1.pdf [file plntcell_tpc.107.056606_1.pdf]

Supplemental Data. Zhong et al. (2008). A Genomic Map of Viroid RNA Motifs Critical for Replication and Systemic Trafficking.

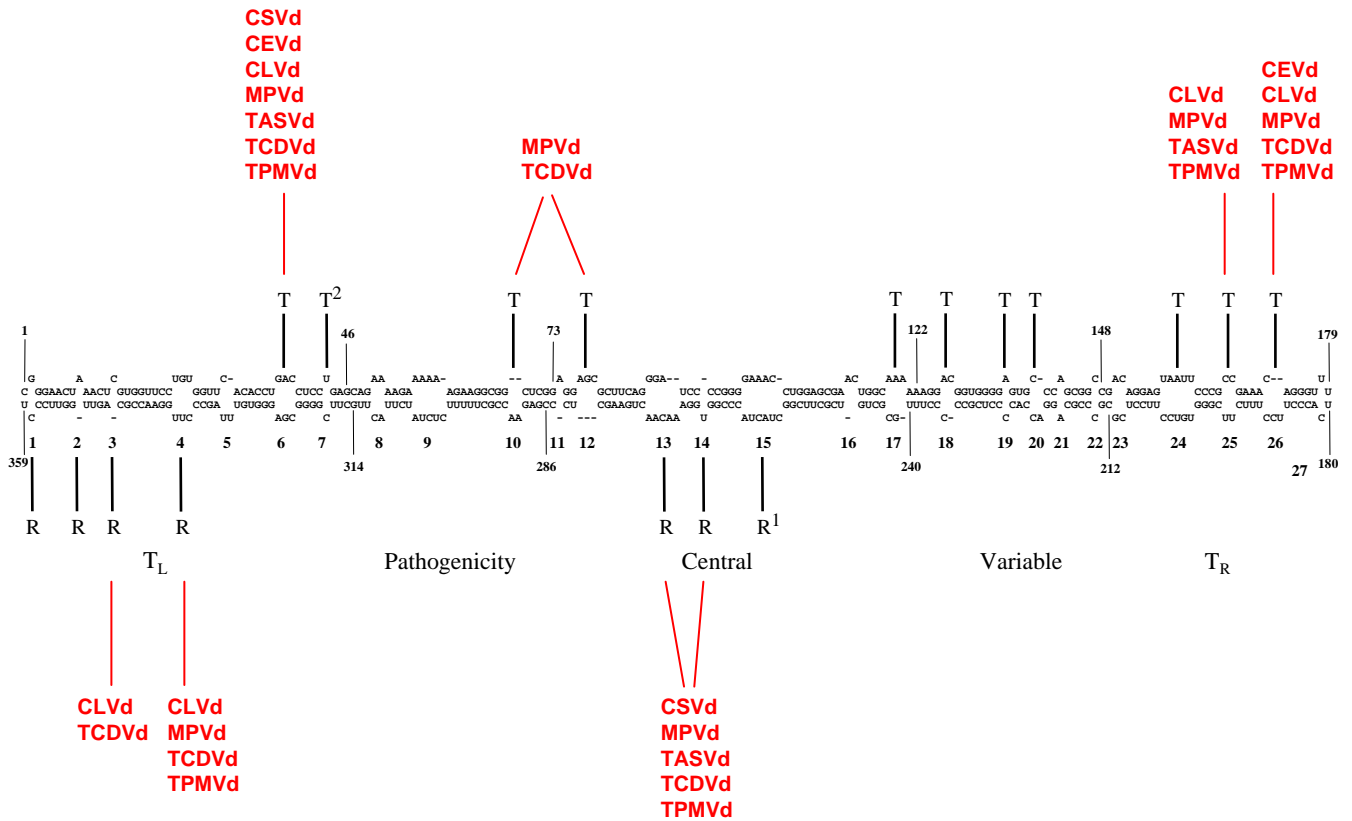

**Supplemental Figure 1.** Secondary structural conservation of some PSTVd loops in other species of genus Pospiviroid that include *Chrysanthemum stunt viroid* (CSVd), *Citrus exocortis viroid* (CEVd), *Columnea latent viroid* (CLVd), *Mexican papita viroid* (MPVd), *Tomato apical stunt viroid* (TASVd), *Tomato chlorotic dwarf viroid* (TCDVd) and *Tomato planta macho viroid* (TPMVd). Tertiary structural conservation has been reported for loop 7 (U43/C318 motif; Zhong et al., 2007) and loop 15 (loop E; Zhong et al., 2006).

**Zhong, X., Tao, X., Stombaugh, J., Leontis, N., and Ding, B. (2007).** Tertiary structure and function of an RNA motif required for plant vascular entry to initiate systemic trafficking. *EMBO J* **26**: 3836-3846.

**Zhong, X., Leontis, N.B., Qian, S., Itaya, A., Qi, Y., Boris-Lawrie, K., and Ding, B. (2006).** Tertiary structural and functional analyses of Loop E motif in viroid RNA reveal its essential role in RNA-templated RNA replication by the nuclear transcription machinery. *J Virol* **80**: 8566-8581.
